# Supplementary material for: Polyamine Catabolism and Its Role in Renal Injury and Fibrosis in Mice Subjected to Repeated Low-Dose Cisplatin Treatment
Source: MDPI journal article supplement (doi:10.3390/biomedicines12030640), 2024-03-13
Supplement: s1 [file s1]

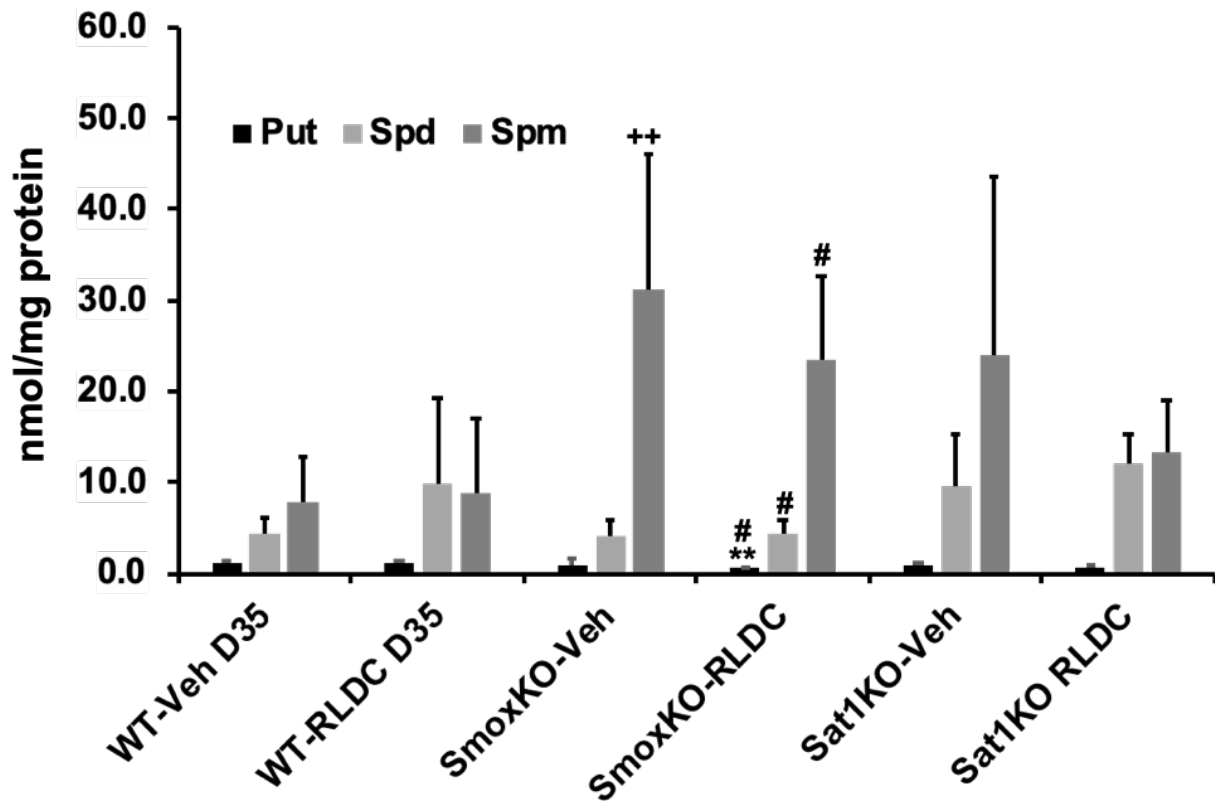

**Supplementary Figure S1. Comparison of renal polyamine levels in control and RLDC-treated Wt, *Smox*-KO and *Sat1*-KO mice.** Renal polyamine levels were compared on day 35 after the final saline (Veh) or cisplatin (RLDC) treatment. The (\*\*) denotes a  $p < 0.01$  when average values of Vehicle and RLDC *Smox*-KO samples were compared. The (++) denotes a  $p < 0.01$  when average values of Vehicle controls of WT and *Smox*-KO samples were compared. The (#) denotes  $p < 0.01$  when average values of WT and *Smox*-KO mice subjected to RLDC were compared.
